# Supplementary material
Source: MDPI journal article supplement (https://www.mdpi.com/1996-1073/11/3/548)
Supplement: s1 [file s1]

Article

Environmental Analysis of Waste-to-Energy—A Portuguese Case Study

Ana Ramos 1, Carlos Afonso Teixeira 2 and Abel Rouboa 2,3,*

1 INEGI-FEUP, Institute of Science and Innovation in Mechanical and Industrial Engineering, Faculty of Engineering of the University of Porto, 4200-465 Porto, Portugal; aramos@inegi.up.pt

2 CITAB, Centre for the Research and Technology of Agro-Environmental and Biological Sciences, University of Trás-os-Montes and Alto Douro, 5001-801 Vila Real, Portugal; cafonso@utad.pt

3 CIENER-INEGI, Centre for Renewable Energy Research, Institute of Science and Innovation in Mechanical and Industrial Engineering, Faculty of Engineering of the University of Porto, 4200-465 Porto, Portugal

***** Correspondence: rouboa@utad.pt; Tel.: +351-259-350-317; Fax: +351-259-350-356

Supplementary Information 1

For the LIPOR case study (LCS) the used landfill is an inert type, standard end-of-life treatment service for specific waste being considered as shown in Figure S1.1.


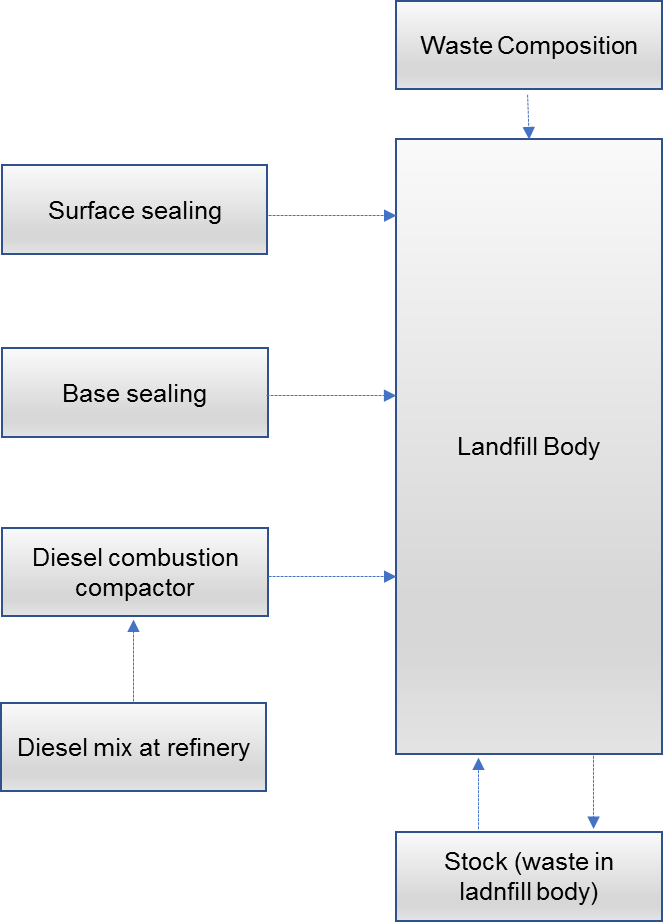


**Figure S1.1.** EU-27 inert waste on landfill, representing an average inert landfill as documented on GaBi database.

For the European Average Landfill (EAL) scenario, the used landfill is a standard MSW type as depicted on Figure S1.2.:


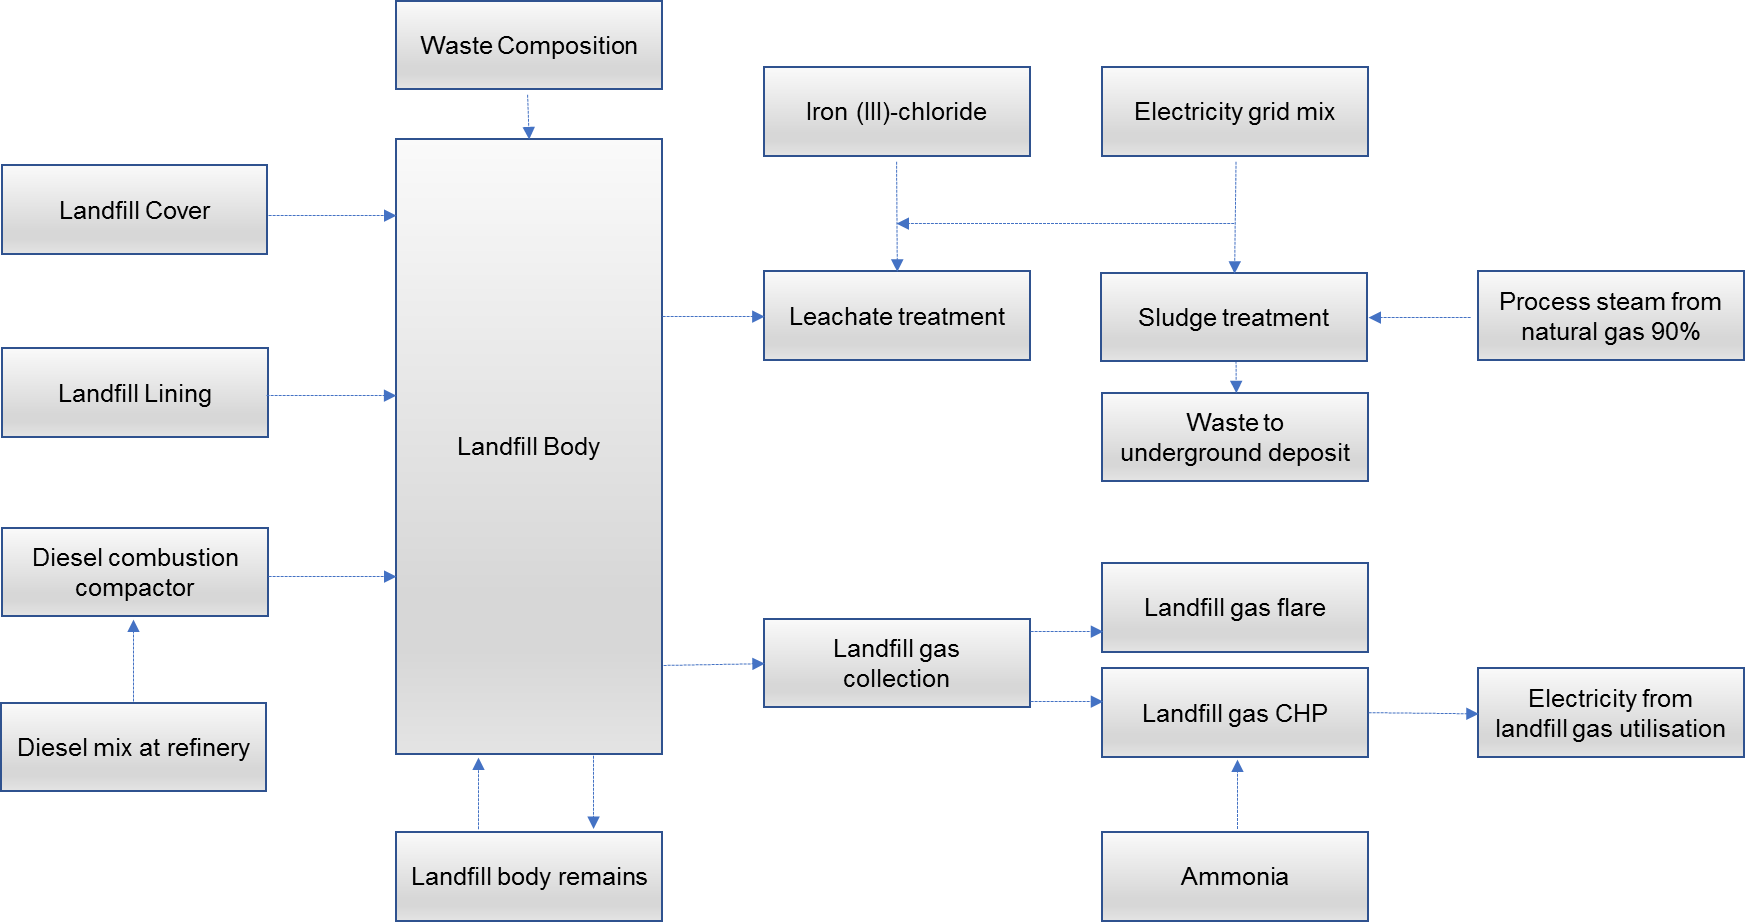


**Figure S1.2.** Municipal solid waste on landfill, representing a sanitary landfill as documented on GaBi database.

**Supplementary Information 2**

The following description refers to the European average incineration (EAI) scenario taken from GaBi database: the data set represents an average European waste-to-energy plant (WtE) for the thermal treatment of municipal solid waste (MSW) with typical technology used in Europe to meet the legal requirements. Environmental impacts for waste collection, transport or any pre-treatment of the waste are not included in the data set. Two different incineration models one with a wet and one with a dry flue gas treatment (FGT) and different NOx-removal technologies are mixed to represent the appliance of the different FGT systems in Europe. According to data published in the BREF document "Waste Incineration" of the European Commission (2006) two-thirds of the MSW is treated within a plant operating with a dry FGT and one-third of the MSW is incinerated within a plant with a wet FGT. For the NOx reduction a share of two-third SNCR (Selective Non-Catalytic Reduction) and one-third SCR (Selective Catalytic Reduction) is used. The plant consists of an incineration line fitted with a grate and a steam generator. The average efficiency of the steam production is about 81.9%. Produced steam is used internally as process-steam and the balance is used to generate electricity or exported as heat to industry or households. An energy balance for the plant was made using data from the "CEWEP Energy Report" (2006) representing 97 waste-to energy plants in Europe. Beside one tonne of MSW with a lower calorific value of approximately 10 GJ/t electricity (0.06 GJ/t of MSW) as well as fuels and heat (0.22 GJ/t of MSW) are imported. 1.09 GJ electricity and 3.16 GJ thermal energy per ton of threaten MSW are distributed to the grid and industrial customers. The effective exported electricity is reduced by 7% due to grid losses (European average). All utilities used in the waste incineration plant, the operation of the underground deposit and the landfill for bottom ash and air pollution control (APC) residues as well as the meltdown processes for the recovered metals are included in the system. Dry FGT: The flue gas treatment system uses a dry technology with adsorbent and a SNCR system for NOx-reduction. The NOx reducing agent ammonia is directly injected into the furnace and reacts with the NOx to nitrogen and water. The flue gas is conditioned, adsorbents added and filtered with fabric filters. Lime milk and small parts of hearth furnace coke are used as adsorbents; a part of the adsorbents is re-circulated. The fly ash together with the adsorbent is mixed together with the boiler ash (treatment of APC residues see below). Wet FGT: The flue gas treatment system uses a pre-dusting stage and an additional downstream de-duster both fabric filters and wet scrubbers to clean the flue gas. After leaving the pre-dedusting stage used to reduce the dust load before the wet scrubbers, the flue gas is feed into the water of the first wet scrubber. Mainly HF and HCl are removed in the first stage. The deposition of sulphur dioxide in the very acid medium of the first stage (pH 0–1) is low and requires a second wet scrubber to remove SO2. Lime milk, hearth furnace coke and trass are used as adsorbents in the filters and scrubbers. The wet scrubbers are operated waste water free. A purification of the brine from the first scrubber to hydrochloric acid and the sulphate slurry from the second scrubber to gypsum is not done. All residues are treated together as APC residues (see below). As final treatment stage, the flue gas passes a SCR system to reduce NOx. Due to the quenching of the flue gas in the wet scrubber and the temperature requirements of the SCR catalyst the flue gas has to be reheated. Emissions: For the emissions HCl, HF, NOx, VOC, N2O, CO, NH3, SO2, dust, dioxin and the heavy metals As, Cd, Co, Cr, Ni and Pb mean emission values per cubic meter of cleaned flue gas published in the BREF document "Waste Incineration" of the European Commission are used. Due to the wide range of emissions for some elements and substances the mathematical mean values are adjusted with additional real plant data. The emission of all other elements and the distribution of all elements and substances into the different residues are calculated by means of transfer coefficients (see model description below). Treatment of residues: The bottom ash approximately 220 kg/t of MSW (approximately 195 kg/t of MSW without metals) is quenched, metals (Fe, Al, Cu, Zn and Pb) are recovered (the recovered Fe represents 10%, the Al 1% and Cu, Zn and Pb 0.6% of the bottom ash) and a three- month ageing process is done to stabilize the bottom ash. 60% of the produced bottom ash after metal recovery and ageing is reused as construction material (and will leave the system as bottom ash for reuse). The remaining 40% are disposed on a landfill. To consider the transfer of elements of the bottom ash into ground water, water bodies or air leachate tests for bottom ash and standard leakage rates for landfills are used. According to the current situation in Europe APC residues (42kg/t of MSW) including boiler ash, filter cake and slurries are disposed in salt mines (43%) or landfills (57%). The disposal in salt mines without free water and contact to ground water reservoirs was modelled as emission free. The operation of the underground deposit is included. The landfill was modelled similar to the bottom ash using leachate test data for APC residues. Transports for bottom ash and APC residues independent of the different routes are considered. To include the export of electricity, heat and metals within the data set a system expansion was used. To calculate the credits for the metal recovery standard metal production data sets of the GaBi 4 Software were used. To obtain the same metal quality like the used data sets for the crediting the scrap has to be remelted and processed. The environmental burdens for the remelting and processing are taken into account in the system boundaries. For electricity and heat export the EU 27 Electricity Mix 2002 (32% nuclear, 19% hard coal, 17% natural gas, 11% lignite, 10% hydro, 6% fuel oil, 5% other) and an EU 27 District Heating Mix 2002 (40% Natural gas, 34% hard coal, 10% Biomass, 7% lignite, 6% fuel oil, 3% peat) are used for the credit calculation.

The following description refers to the European average landfill (EAL) scenario taken from GaBi database: the data set represents a typical municipal waste landfill with surface and basic sealing meeting European limits for emissions. Site is including landfill gas treatment, leachate treatment, sludge treatment and deposition. Landfill height 30 m, landfill area 40.000 sqm; 100 years deposit. The effort for sealing materials (clay, mineral coating, PE film) and diesel for the compactor is included in the data set. Distribution of landfill gas: 22 % flare, 28 % used, 50 % emissions. Use of landfill gas represents industrial country standard. Average landfill gas composition and amount for stable methane phase. Precipitation data from (660 mm/a). A rate of 60% transpiration/run off is assumed. Landfill leachate: exponential solubility of fluids is assumed. Solubility factors are used for different solubility calculations. Leachate and landfill body are assumed to be homogeneous. Landfill body is saturated. No circulation of leachate. Basic sealing effectively for leachate: 70%. Leachate treatment includes active carbon and flocculation/precipitation processing. Sludge treatment and deposition is included. The elementary analysis is shown in the corresponding column in the table below. The background system is addressed as follows (European conditions): The sealing contains gravel, sand, clay and polyethylene film as most relevant processes. Gravel and sand are used as filter layers, PE film as waterproofed sealing and clay as mineral coverage in the surface and basic sealing. Gravel, sand and clay are mined from dry quarry. The basis for the production of polyethylene film is crude oil. All manufacturing processes of the sealing materials are considered. All allocations are used in the upstream processes. For the combined heat and power production, allocation by exergetic content is applied. For the electricity generation and by-products, e.g. gypsum, allocation by market value is applied due to no common physical properties. Within the refinery allocation by net calorific value and mass is used. For the combined crude oil, natural gas and natural gas liquids production allocation by net calorific value is applied. Accounted waste storage period, precipitation rate, net calorific value and volume of waste gas (see technological description). Cut-off rules for each unit process: Coverage of at least 95 % of mass and energy of the input and output flows, and 95 % of their environmental relevance (according to expert judgement). The data set represents a landfill model which is based on statistical and literature information. LCI modelling is fully consistent. The data set can be used to characterise the treatment of defined waste fractions in a representative manner within user specific product LCAs. Collection, transport and pre-treatment are not included. The data set is partly terminated and lists the elementary flows and generated energy product (electricity) from landfill gas utilisation. Only environmental impacts of the landfill process occurring within 100 years are considered.

**
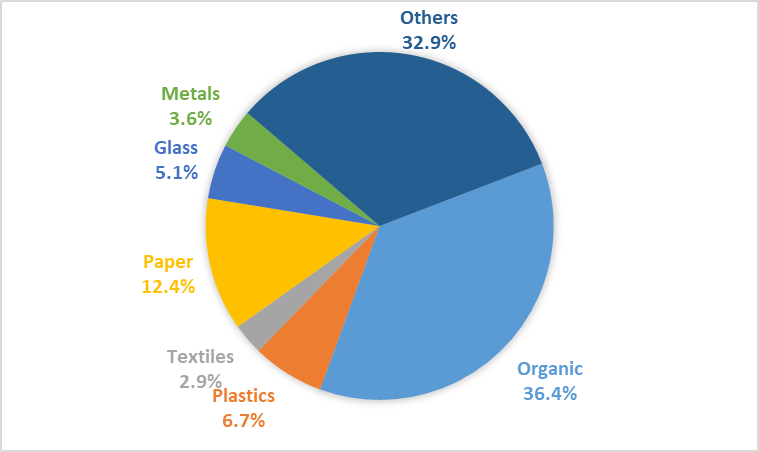
**

**Figure S2.1.** Waste average composition in Europe, as documented on GaBi database.

Supplementary Information 3

**Table S3.1.** Life cycle inventory assessment for scenarios 1 and 2, per tonne of treated waste.

| LCI | Sc1 | Sc2 |
| --- | --- | --- |
| Inputs and outputs | | |
| Waste for incineration, t | 1 | |
| Lower Heating Value, kJ | 7700 | |
| Water, m3 | 168.0 | 160.4 |
| Diesel, MJ | 45 | 25 |
| Natural gas, Nm3 | 8.8 | 8.8 |
| Auxiliary materials | | |
| - Limestone, kg | 7.04 | 17.6 |
| - Activated charcoal, kg | 0.22 | 1.44 |
| - Urea, kg | 0.53 | 0.39 |
| Produced electricity, MWh | 0.450 | 0.761 |
| Emissions | | |
| - HCl, g/Nm3 | 32.9 | 16.8 |
| - NOx, kg/Nm3 | 0.60 | 0.96 |
| - NH3, g/Nm3 | 0.42 | 0.39 |
| - HF, g/Nm3 | 1.1 | 1.0 |
| - SO2, g/Nm3 | 75 | 56 |
| - Particulate matter, g/Nm3 | 4.8 | 5.0 |
| - CO, g/Nm3 | 24.0 | 23.0 |
| - Hg, µg/Nm3 | 7.3 | 7.8 |
| Neutralized ashes, kg | 181.1 | 66.1 |
| Removed slags, kg | 21.1 | 188 |

Supplementary Information 4

**Table S4.1.** Impact assessment for the incineration main processes (reference case Sc0).

| Main flows | Incineration | Flue gas treatment + ash inertization | Landfill |
| --- | --- | --- | --- |
| Total Flows (kg) | -1.314 × 106 | 1.007 × 103 | 7.217 × 103 |
| Resources | -6.570 × 105 | 756.9 | 3.506 × 103 |
| Deposited goods | -397.7 | 2.850 | 2.862 × 102 |
| Emissions to air | -1.003 × 104 | 6.278 | 8.271 × 10-1 |
| Emissions to fresh water | -6.466 × 105 | 240.4 | 3.340 × 103 |
| Emissions to sea water | -3.065 × 109 | 2.846 × 10-1 | 2.018 |
| Emissions to agricultural soil | -8.34479 × 10-5 | 5.059 × 10-7 | 2.865 × 10-6 |
| Emissions to industrial soil | -3.775 × 10-3 | 2.451 × 10-5 | 1.679 × 10-4 |

**Table S4.2**. Impact assessment for the European average incineration main processes (EAI).

| Main flows | Incineration | Flue gas treatment + ash inertization | Landfill |
| --- | --- | --- | --- |
| Total Flows (kg) | -5.987 × 105 | 1.006 × 103 | 1.790 × 104 |
| Resources | -2.993 × 105 | 7.569 × 102 | 8.862 × 103 |
| Deposited goods | -1.812 × 102 | 2.850 | 2.414 × 102 |
| Emissions to air | -4.571 × 103 | 5.489 | 3.159 × 102 |
| Emissions to fresh water | -2.946 × 105 | 2.404 × 102 | 8.469 × 103 |
| Emissions to sea water | -1.397 | 2.846 × 10-1 | 1.475 |
| Emissions to agricultural soil | -3.800 × 10-5 | 5.059 × 10-7 | 2.714 × 10-6 |
| Emissions to industrial soil | -1.720 × 10-3 | 2.451 × 10-5 | 8.089 × 10-1 |
